# Supplementary material for: Enhanced electrocatalytic activity of three-dimensionally-ordered macroporous La0.6Sr0.4CoO3−δ perovskite oxide for Li–O2 battery application
Source: Royal Society of Chemistry journal article supplement (doi:10.1039/c6ra02459a), 2016-01-01
Supplement: c6ra02459a1.pdf [file c6ra02459a1.pdf]

## Supporting Information

# Enhanced electrocatalytic activity of three- dimensionally-ordered macroporous $\text{La}_{0.6}\text{Sr}_{0.4}\text{CoO}_{3-\delta}$ perovskite oxide for $\text{Li}-\text{O}_2$ battery application

*Mi Young Oh,<sup>a</sup> Jong Ju Lee,<sup>b</sup> Awan Zahoor,<sup>d</sup> G. Gnana kumar,<sup>e</sup> and Kee Suk Nahm<sup>a,b,c,\*</sup>*

a. R&D Education Center for Fuel Cell Materials & Systems.

b. Department of Energy Storage and Conversion Engineering.

c. School of Chemical Engineering, Chonbuk National University, Jeonju 561-756, Republic  
of Korea

d. Department of Chemical Engineering, N.E.D. University of Engineering & Technology.  
University Road Karachi, 75270, Pakistan

e. Department of Physical Chemistry, Madurai-Kamaraj University, Madurai-625 021, India

\*Corresponding author:

E-mail address - [nahmks@jbnu.ac.kr](mailto:nahmks@jbnu.ac.kr)

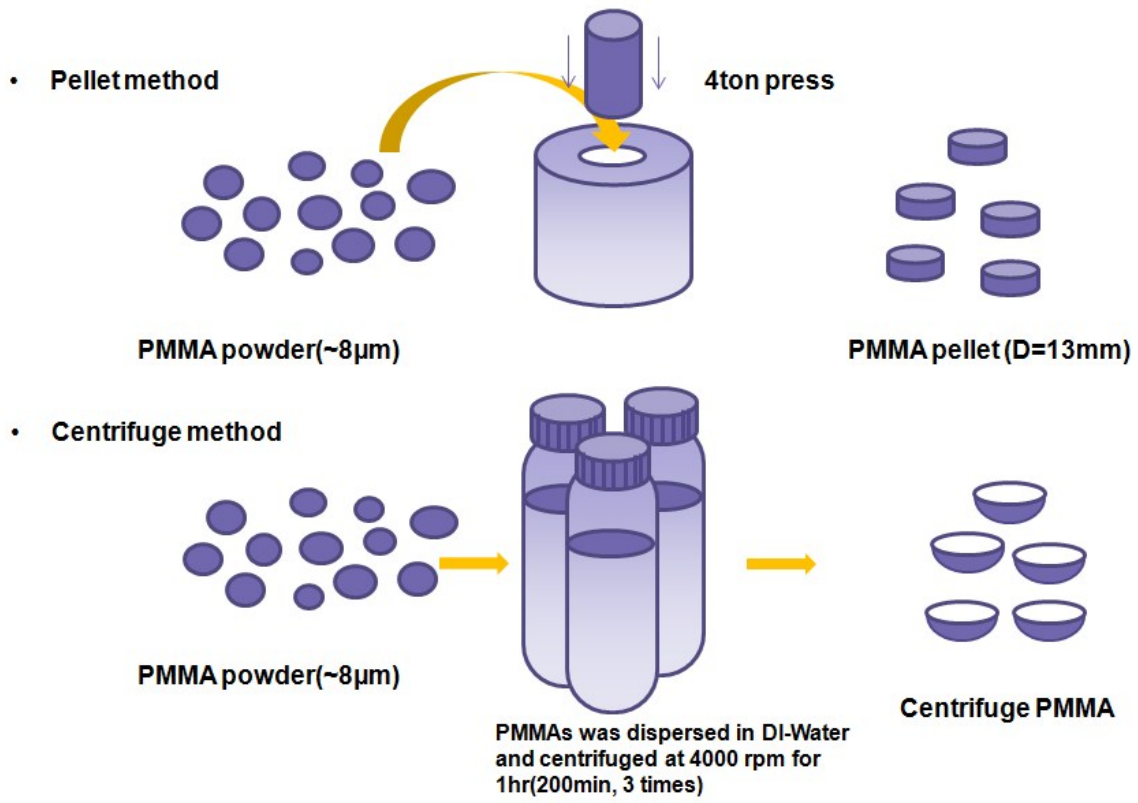

Figure S1. A schematic illustration of PMMA assembly methods.

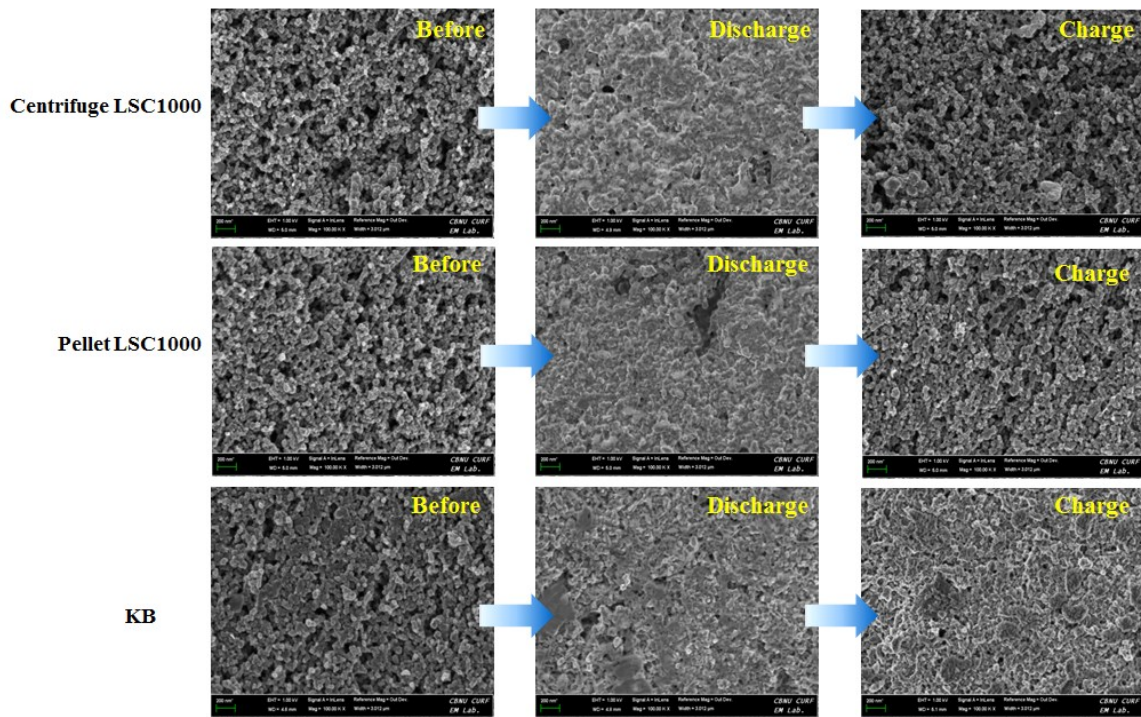

Figure S2. SEM images ( $\times 100,000$ ) before and after discharge/charge during the first cycle for air cathodes with and without catalysts (Pellet LSC1000 and Centrifuge LSC1000 catalysts).

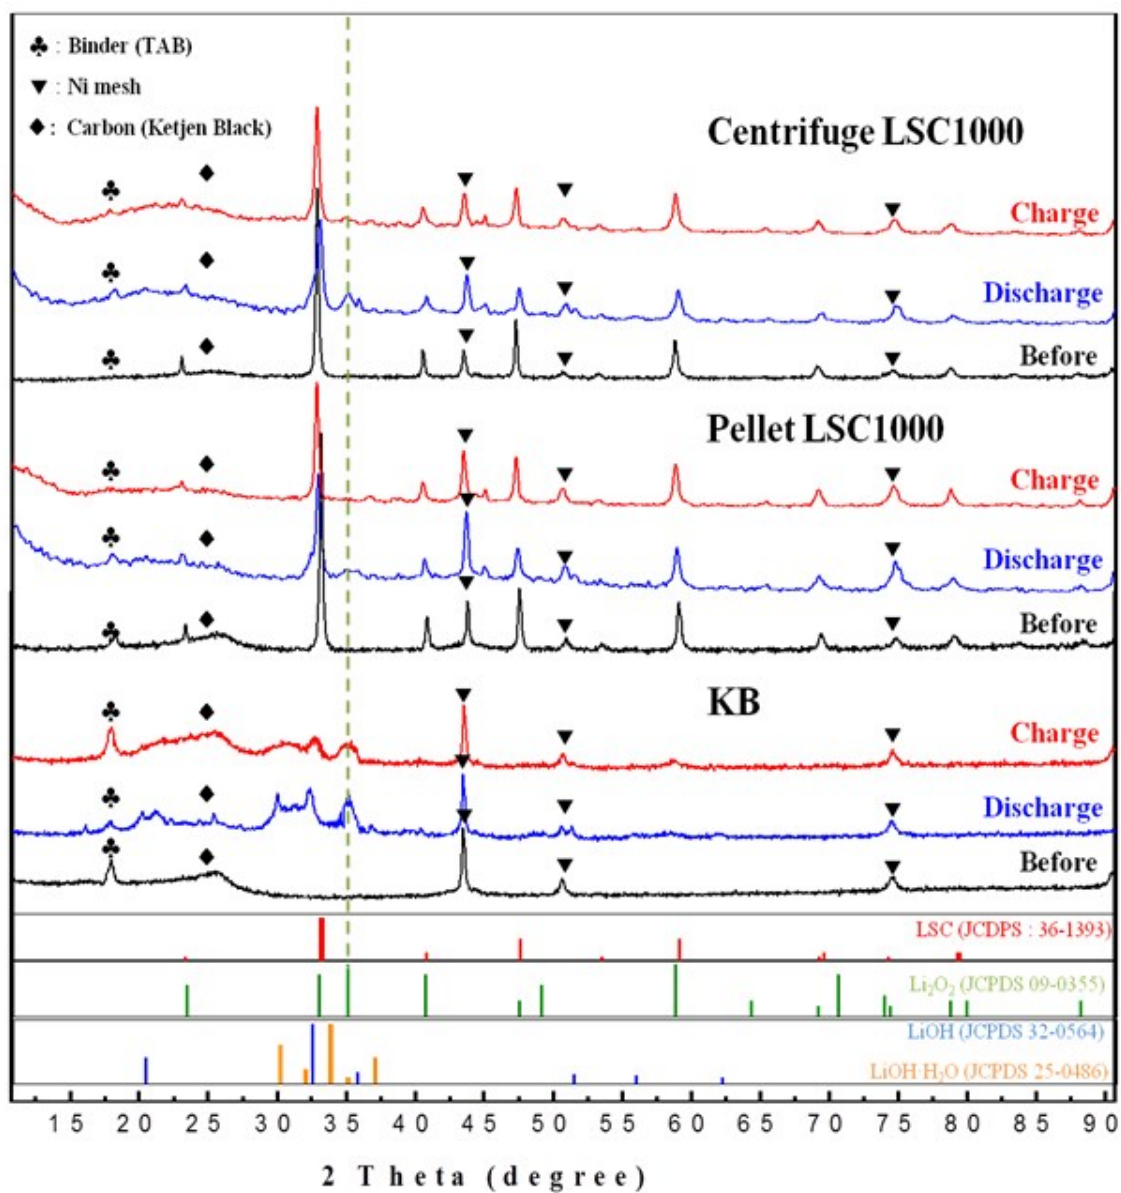

Figure S3. XRD before and after discharge/charge during the first cycle for air cathodes with and without catalysts (Pellet LSC1000 and Centrifuge LSC1000 catalysts).
